# Supplementary material for: CD8+ tissue-resident memory T-cell development depends on infection-matching regulatory T-cell types
Source: Springer Nature journal article supplement (doi:10.1038/s41467-023-41364-w), 2023-09-11
Supplement: MOESM1 [file 41467_2023_41364_MOESM1_ESM.pdf]

## Supplementary data file

### **CD8<sup>+</sup> tissue-resident memory T cell development depends on infection matching regulatory T cell types**

Leandro Barros<sup>1</sup>, Daryna Piontkivska<sup>2</sup>, Patrícia Figueiredo-Campos<sup>1</sup>, Júlia Fanczal<sup>1</sup>, Sofia Pereira Ribeiro<sup>1</sup>, Marta Baptista<sup>1</sup>, Silvia Ariotti<sup>1</sup>, Nuno Santos<sup>3,4</sup>, Maria João Amorim<sup>3,5</sup>, Cristina Silva Pereira<sup>2</sup>, Marc Veldhoen<sup>1\*#</sup> and Cristina Ferreira<sup>1\*#</sup>

<sup>1</sup>Instituto de Medicina Molecular | João Lobo Antunes, Faculdade de Medicina da Universidade de Lisboa, Av. Professor Egas Moniz, Lisbon, 1649-028, Portugal

<sup>2</sup>Instituto de Tecnologia Química e Biológica António Xavier, Av. da República, Oeiras, 2780-157 Portugal

<sup>3</sup>Instituto Gulbenkian de Ciência, Rua da Quinta Grande 6, Oeiras, 2780-156 Portugal

<sup>4</sup>Current address: The Francis Crick Institute, 1 Midland Road, London NW1 1AT, UK

<sup>5</sup>Universidade Católica Portuguesa, Católica Médica School, Católica Biomedical Research Centre, Palma de Cima, 1649-023, Portugal.

\*These authors jointly supervised this work.

## **Supplementary data inventory**

### **Supplementary data figures 1-7**

Supplementary Figure 1. *Influenza* infection results in strong T cell response in the lungs

Supplementary Figure 2. *Nippostrongylus brasiliensis* infection results in a type-2 response, with limited CD8 T cell recruitment to the lungs

Supplementary Figure 3. *Aspergillus fumigatus* infection results in a type-3 response, with potentiated CD8 T cell contribution

Supplementary Figure 4. Successful ROR $\gamma$ t T<sub>REG</sub> cell ablation

Supplementary Figure 5. SFB faecal transplant results in a mixed Th-1/Th-17 immune response

Supplementary Figure 6. T<sub>RM</sub> cell identity is maintained

Supplementary Figure 7. Flow cytometry analysis gating strategy

### **Supplementary table 1**

Details of antibodies used in the study

# Supplementary Figure 1

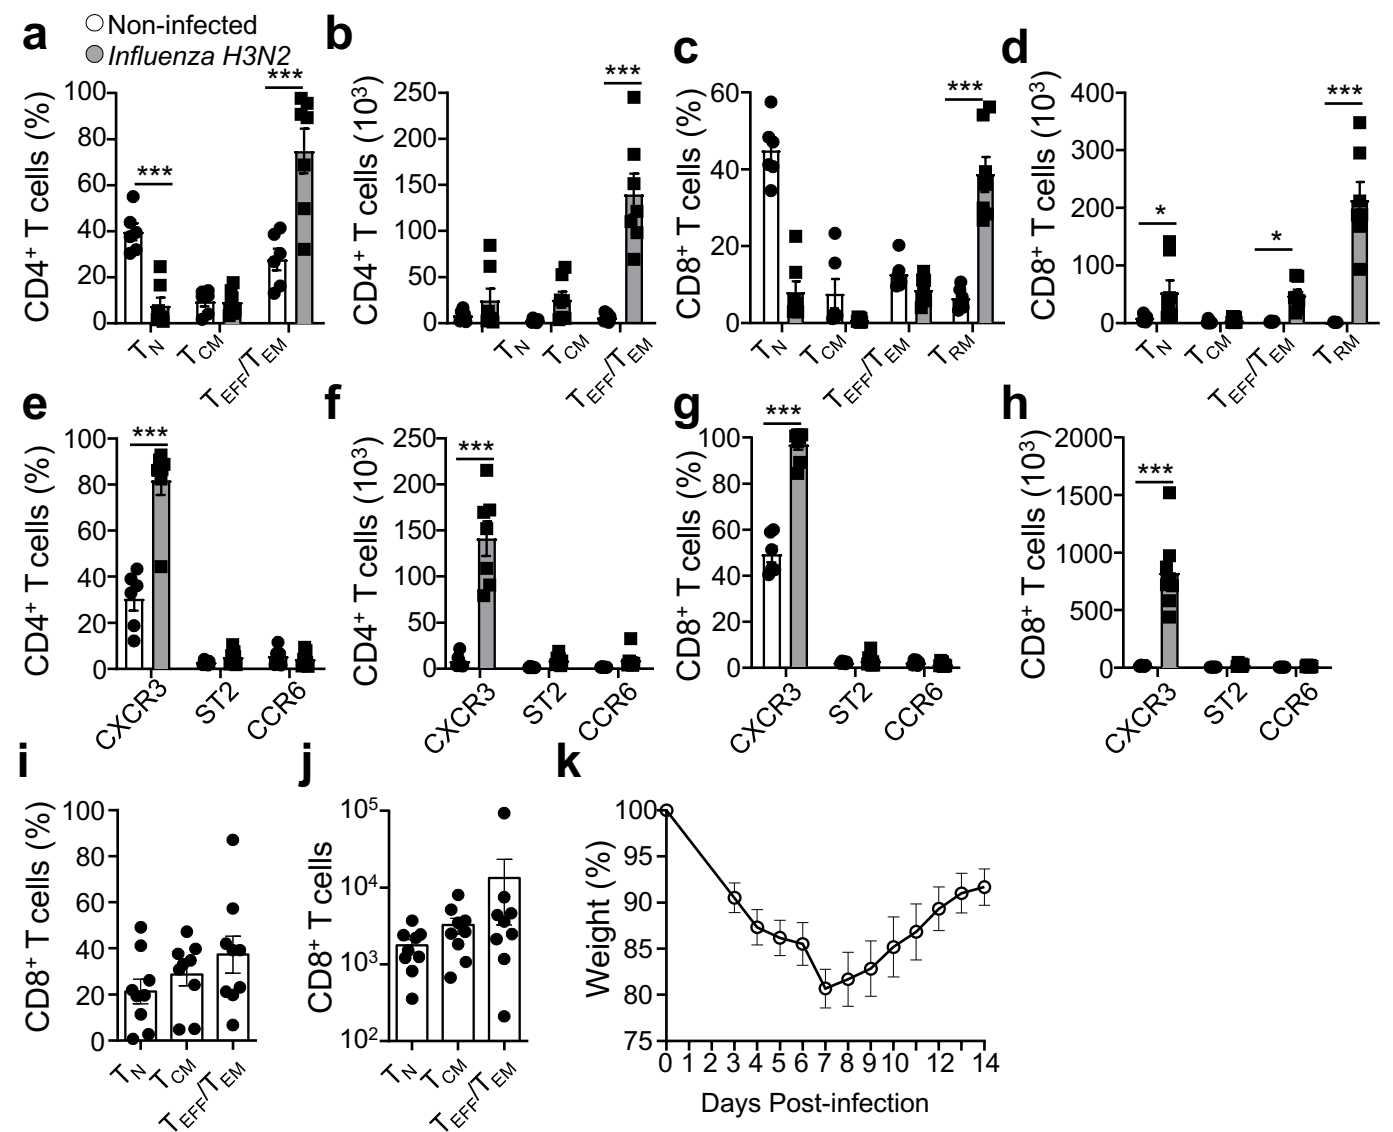

**Supplementary Figure 1. Influenza infection results in strong T cell response in the lungs.** C57BL/6 mice were intranasally infected with 1000 PFU of Influenza A X31 strain (H3N2). 10 days post-infection lungs were collected, and cells were isolated and analysed via flow cytometry for T cell subsets, with (a) percentage,  $p_{(\text{Non-infected vs Influenza H3N2})}$ :  $T_N$ ,  $p=0.000119$ ;  $T_{EM}/T_{EFF}$ ,  $p<0.000001$ ) and (b) number,  $p_{(\text{Non-infected vs Influenza H3N2})}$ :  $T_{EM}/T_{EFF}$ ,  $p<0.000001$ , of CD4<sup>+</sup> T naïve ( $T_N$ , CD44<sup>+</sup>CD62L<sup>+</sup>), central memory ( $T_{CM}$ , CD44<sup>+</sup>CD62L<sup>+</sup>) and effector memory/effector ( $T_{EM}/T_{EFF}$ , CD44<sup>+</sup>CD62L<sup>-</sup>) cells, and (c) percentage  $p_{(\text{Non-infected vs Influenza H3N2})}$ :  $T_{RM}$ ,  $p<0.000001$ , and (d) number of CD8<sup>+</sup>  $T_N$ ,  $T_{CM}$ , and  $T_{EM}/T_{EFF}$  cells with CD8<sup>+</sup>  $T_{RM}$  cells (CD69<sup>+</sup>KLRG1<sup>+</sup>CD8<sup>+</sup>),  $p_{(\text{Non-infected vs Influenza H3N2})}$ :  $T_N$ ,  $p=0.047002$ ;  $T_{EM}/T_{EFF}$ ,  $p=0.040349$ ;  $T_{RM}$ ,  $p<0.000001$ ) (non-infected  $n=6$ , infected  $n=7$ ,  $N=3$ ). (e,f,g,h). Foxp3<sup>WT</sup> mice were analysed for indicated receptors on (e,f) CD4<sup>+</sup> or (g,h) CD8<sup>+</sup> T cells in percentage (e,g) and numbers (f,h),  $p_{(\text{Non-infected vs Influenza H3N2})}$ : percentage and cell number CXCR3<sup>+</sup> CD4 and CD8 T cells,  $p<0.000001$ , (non-infected  $n=6$ , infected  $n=8$ ,  $N=3$ ). (i,j) Foxp3<sup>WT</sup> mice received CD8<sup>CD45.1</sup> T cells intravenously, one day prior to infection: day 14 days post-infection the transferred T cells were assessed for their status in (i) percentage and (j) numbers of  $T_N$ ,  $T_{CM}$  and  $T_{EM}/T_{EFF}$  cells in the spleen ( $n=9$ ,  $N=4$ ). (k) Representative weight curve after infection at day 0 ( $n=6$ ,  $N=2$ ). 2-sided Mann-Whitney analysis was applied to compare the differences between infected and non-infected groups. Data is presented as bars of mean  $\pm$  SEM with single data points.

## Supplementary Figure 2

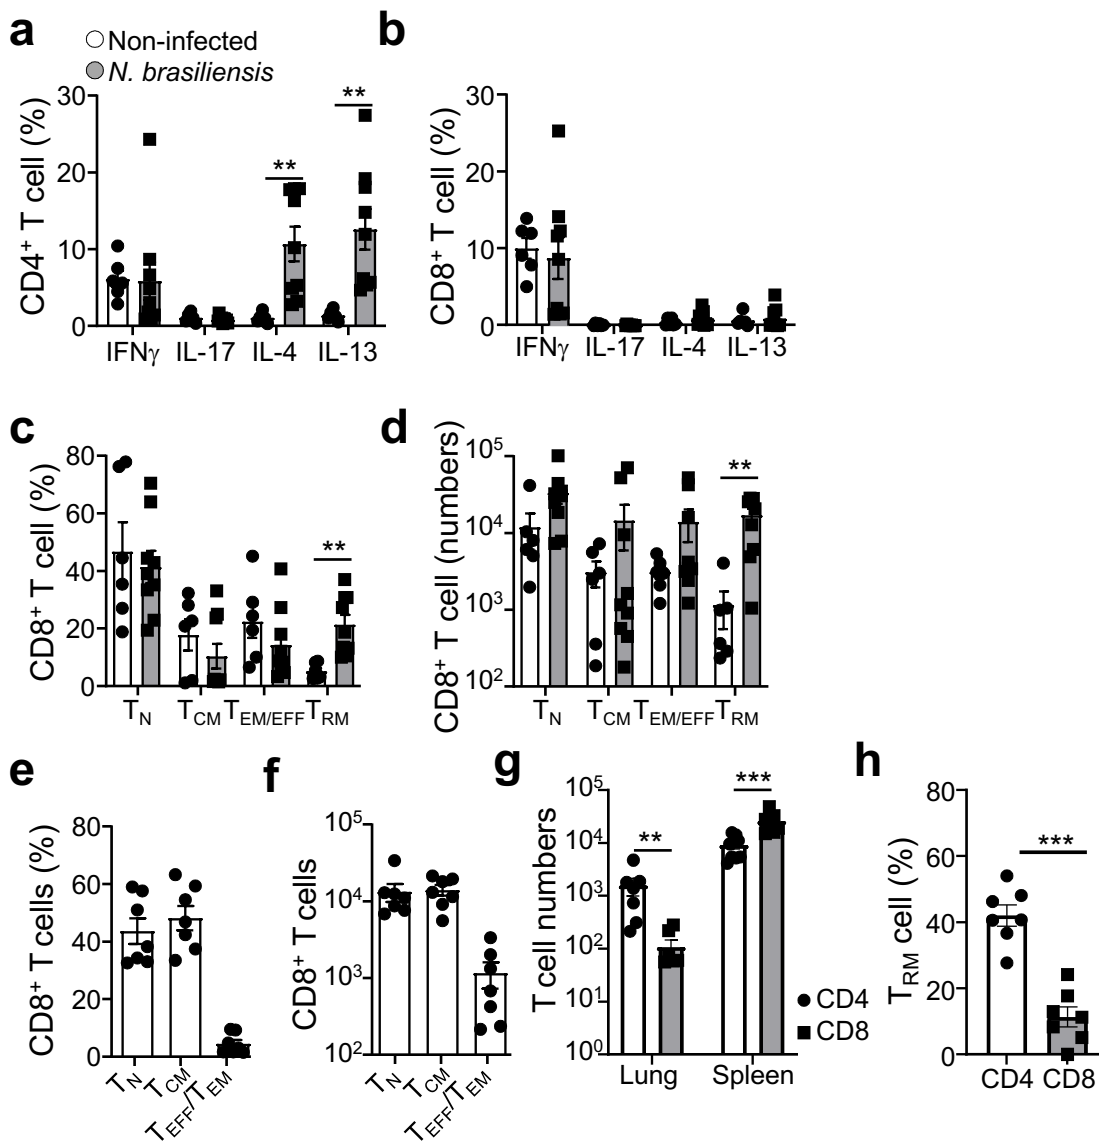

**Supplementary Figure 2. *Nippostrongylus brasiliensis* infection results in a type-2 response, with limited CD8 T cell recruitment to the lungs.** C57BL/6 mice were subcutaneously infected with 300 stage L3 larvae of *Nippostrongylus brasiliensis*. 7 days post-infection lungs were collected, and cells were isolated and analysed via flow cytometry for cytokine production and T cell populations, with percentage of CD44<sup>+</sup> (a) CD4<sup>+</sup>,  $p_{(\text{Non-infected vs } Nippostrongylus \text{ brasiliensis})}$ : IL-4,  $p=0,004384$ ; IL-13,  $p=0,004416$  and (b) CD8<sup>+</sup> T cells producing indicated cytokines. (c,d) Analysis of CD8<sup>+</sup> T cells with (c) percentage,  $p_{(\text{Non-infected vs } Nippostrongylus \text{ brasiliensis})}$ : T<sub>RM</sub>,  $p=0,002496$ , and (d) number,  $p_{(\text{Non-infected vs } Nippostrongylus \text{ brasiliensis})}$ : T<sub>RM</sub>,  $p=0,003648$  of CD8<sup>+</sup> T naïve (T<sub>N</sub>, CD44<sup>+</sup>CD62L<sup>+</sup>), central memory (T<sub>CM</sub>, CD44<sup>+</sup>CD62L<sup>+</sup>), effector memory/effector (T<sub>EM</sub>/T<sub>EFF</sub>, CD44<sup>+</sup>CD62L<sup>-</sup>) cells, and tissue resident (T<sub>RM</sub>, CD69<sup>+</sup>KLRG1<sup>-</sup>) cells (non-infected  $n=6$ , infected  $n=9$ ,  $N=3$ ). (e,f) Foxp3<sup>WT</sup> mice received CD8<sup>CD45.1</sup> T cells intravenously, one day prior to infection. At day 14 post-infection, spleens were analysed for presence of transferred cells in (e) percentage and (f) numbers of T<sub>N</sub>, T<sub>CM</sub> and T<sub>EM</sub>/T<sub>EFF</sub> cell subsets ( $n=7$ ,  $N=3$ ). (g,h) Foxp3<sup>WT</sup> mice received CD8<sup>CD45.1</sup> ( $n=7$ ,  $N=3$ ) or CD4<sup>CD45.1</sup> T cells ( $n=7$  for lungs,  $n=9$  for spleens,  $N=2$ ) intravenously, one day prior to infection. At day 14 post-infection, spleens and lungs were analysed for presence of transferred cells (g),  $p_{(\text{CD4 vs CD8})}$ : Lung,  $p=0,002331$ ; Spleen,  $p=0,000350$  and the proportion of T<sub>RM</sub> cells in the lungs (h),  $p_{(\text{CD4 vs CD8})}=0,0006$ . 2-sided Mann-Whitney analysis was applied to compare non-infected versus infected groups. Data is presented as bars of mean  $\pm$  SEM with single data points.

# Supplementary Figure 3

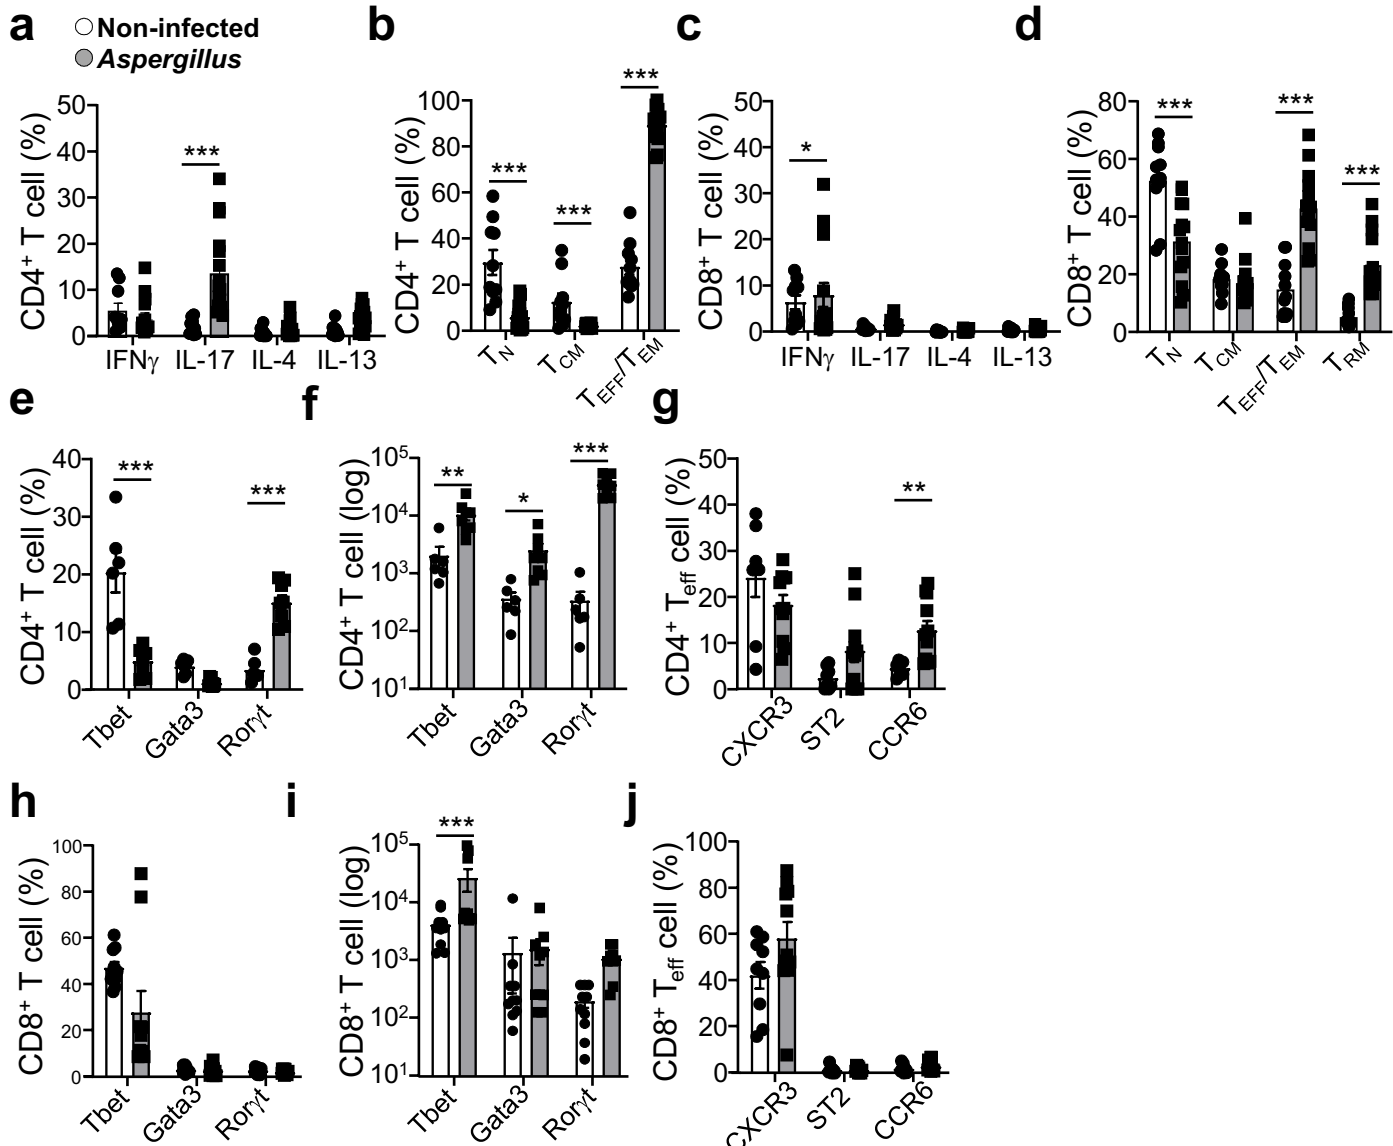

## Supplementary Figure 3. *Aspergillus fumigatus* infection results in a type-3 response, with potentiated CD8 T cell contribution.

C57BL/6 mice intranasally challenged four times every 3 days with  $10^6$  spores of *Aspergillus fumigatus*. 10 days post-infection lungs were collected, and cells were isolated and analysed via flow cytometry for cytokine production, and memory subsets. (a,b,c,d) Percentages of CD4<sup>+</sup> T cells with respect to (a) indicated cytokine production from CD44<sup>+</sup> cells,  $p_{(\text{Non-infected vs } \textit{Aspergillus})}$ : IL-17,  $p=0,000137$ , and (b) naïve (T<sub>N</sub>, CD44<sup>+</sup>CD62L<sup>+</sup>), central memory (T<sub>CM</sub>, CD44<sup>+</sup>CD62L<sup>+</sup>), effector memory/effector (T<sub>EM</sub>/T<sub>EFF</sub>, CD44<sup>+</sup>CD62L<sup>-</sup>) cells,  $p_{(\text{Non-infected vs } \textit{Aspergillus})}$ : T<sub>N</sub>,  $p<0,000001$ ; T<sub>CM</sub>,  $p=0,017999$ ; T<sub>EM</sub>/T<sub>EFF</sub>,  $p<0,000001$ , or CD8<sup>+</sup> T cells, and (c) cytokine production from CD44<sup>+</sup> T cells,  $p_{(\text{Non-infected vs } \textit{Aspergillus})}$ : IFN- $\gamma$ ,  $p=0,044046$  and (d) subset distribution of T<sub>N</sub>, T<sub>CM</sub>, T<sub>EM</sub>/T<sub>EFF</sub> and tissue resident memory (T<sub>RM</sub>, CD69<sup>+</sup>KLRG1<sup>-</sup>) T cells,  $p_{(\text{Non-infected vs } \textit{Aspergillus})}$ : T<sub>N</sub>,  $p=0,01575$ ; T<sub>EM</sub>/T<sub>EFF</sub>,  $p=0,000019$ ; T<sub>RM</sub>,  $p=0,000023$ , (cytokine production; non-infected,  $n=10$ ; infected  $n=12$ ,  $N=4$ ; subset analysis: non-infected,  $n=10$ ; infected  $n=13$ ,  $N=4$ ). (e,f,g,h,i,j) Foxp3<sup>WT</sup> mice were analysed for indicated major transcription factors in CD4<sup>+</sup> T cells, in (e) percentage,  $p_{(\text{Non-infected vs } \textit{Aspergillus})}$ : Tbet,  $p=0,000342$ ; ROR $\gamma$ t,  $p=0,000011$ , and (f) numbers,  $p_{(\text{Non-infected vs } \textit{Aspergillus})}$ : Tbet,  $p=0,008197$ ; GATA-3,  $p=0,027401$ ; ROR $\gamma$ t,  $p=0,000029$  (non-infected  $n=4$ , infected,  $n=5$ ,  $N=3$ ), CD8<sup>+</sup> T cells, in (h) percentage and (i) numbers,  $p_{(\text{Non-infected vs } \textit{Aspergillus})}$ : Tbet,  $p=0,000988$  (non-infected  $n=8$ , infected,  $n=9$ ,  $N=3$ ), and chemokine receptors on (g) CD4<sup>+</sup>,  $p_{(\text{Non-infected vs } \textit{Aspergillus})}$ : CCR6,  $p=0,003572$  (non-infected  $n=6$ , infected  $n=11$ ,  $N=3$ ) and (j) CD8<sup>+</sup> T cells (non-infected  $n=7$ , infected  $n=8$ ,  $N=3$ ). 2-sided Mann-Whitney analysis was applied to compare the differences between non-infected and infected groups. Data is presented as bars of mean  $\pm$  SEM with single data points.

# Supplementary Figure 4

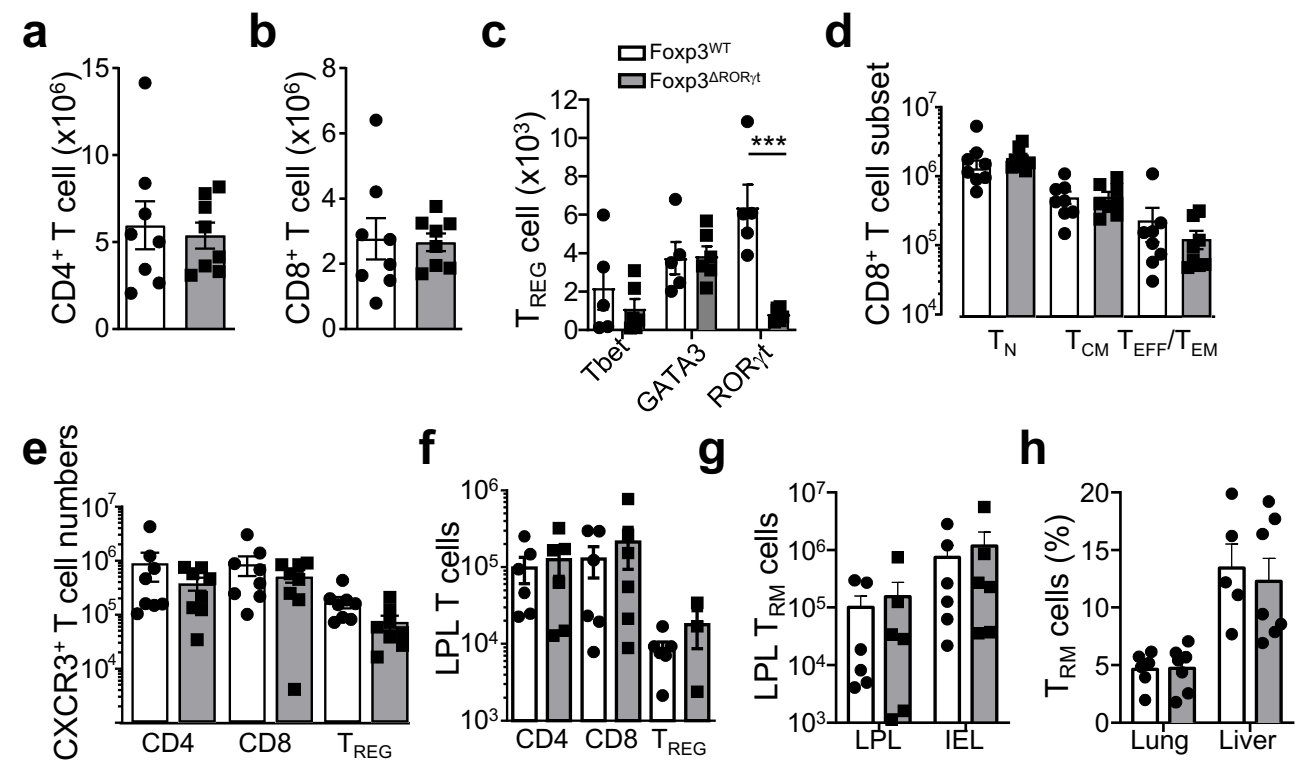

**Supplementary Figure 4. Successful RORγt T<sub>REG</sub> cell ablation.** Foxp3<sup>WT</sup> and Foxp3<sup>ΔRORγt</sup> were compared at steady-state for their T<sub>REG</sub>, CD4<sup>+</sup> and CD8<sup>+</sup> T cell compartments in lung, liver, spleen, small intestinal lamina propria lymphocytes (LPL), and small intestinal intraepithelial lymphocytes (IEL). (a,b) Total numbers of (a) CD4<sup>+</sup> and (b) CD8<sup>+</sup> T cells in spleen (n=8, N=3). (c) Assessment of LPL T<sub>REG</sub> cell numbers for indicated transcription factors,  $p_{(\text{Foxp3}^{\text{WT}} \text{ vs } \text{Foxp3}^{\Delta\text{ROR}\gamma\text{t}})} < 0.000001$  (Foxp3<sup>WT</sup> n=5, Foxp3<sup>ΔRORγt</sup> n=6, N=3). (d) Splenic CD8<sup>+</sup> T cell subset numbers for naïve (T<sub>N</sub>, CD44<sup>+</sup>CD62L<sup>+</sup>), central memory (T<sub>CM</sub>, CD44<sup>+</sup>CD62L<sup>+</sup>), effector memory/effector (T<sub>EM</sub>/T<sub>EFF</sub>, CD44<sup>+</sup>CD62L<sup>-</sup>) cells (n=8). (e) Cell numbers of chemokine receptor CXCR3-expressing CD4, CD8 and T<sub>REG</sub> cells (n=8, N=3). (f) LPL CD4<sup>+</sup>, CD8<sup>+</sup> and T<sub>REG</sub> cell numbers (Foxp3<sup>WT</sup> n=6, Foxp3<sup>ΔRORγt</sup> n=7, N=3). (g) LPL and IEL T<sub>RM</sub> (CD69<sup>+</sup>KLRG1<sup>-</sup>CD103<sup>+</sup>CD8<sup>+</sup>) cell number (n=6, N=3). (h) Assessment of lung and liver T<sub>RM</sub> cell (CD69<sup>+</sup>KLRG1<sup>-</sup>CD8<sup>+</sup>) percentage within total CD8<sup>+</sup> T cells in both mouse lines (Foxp3<sup>WT</sup> n=5, Foxp3<sup>ΔRORγt</sup> n=6, N=3). 2-sided Mann-Whitney analysis was applied to compare the differences between mouse strains. Data is presented as bars of mean ± SEM with single data points.

# Supplementary Figure 5

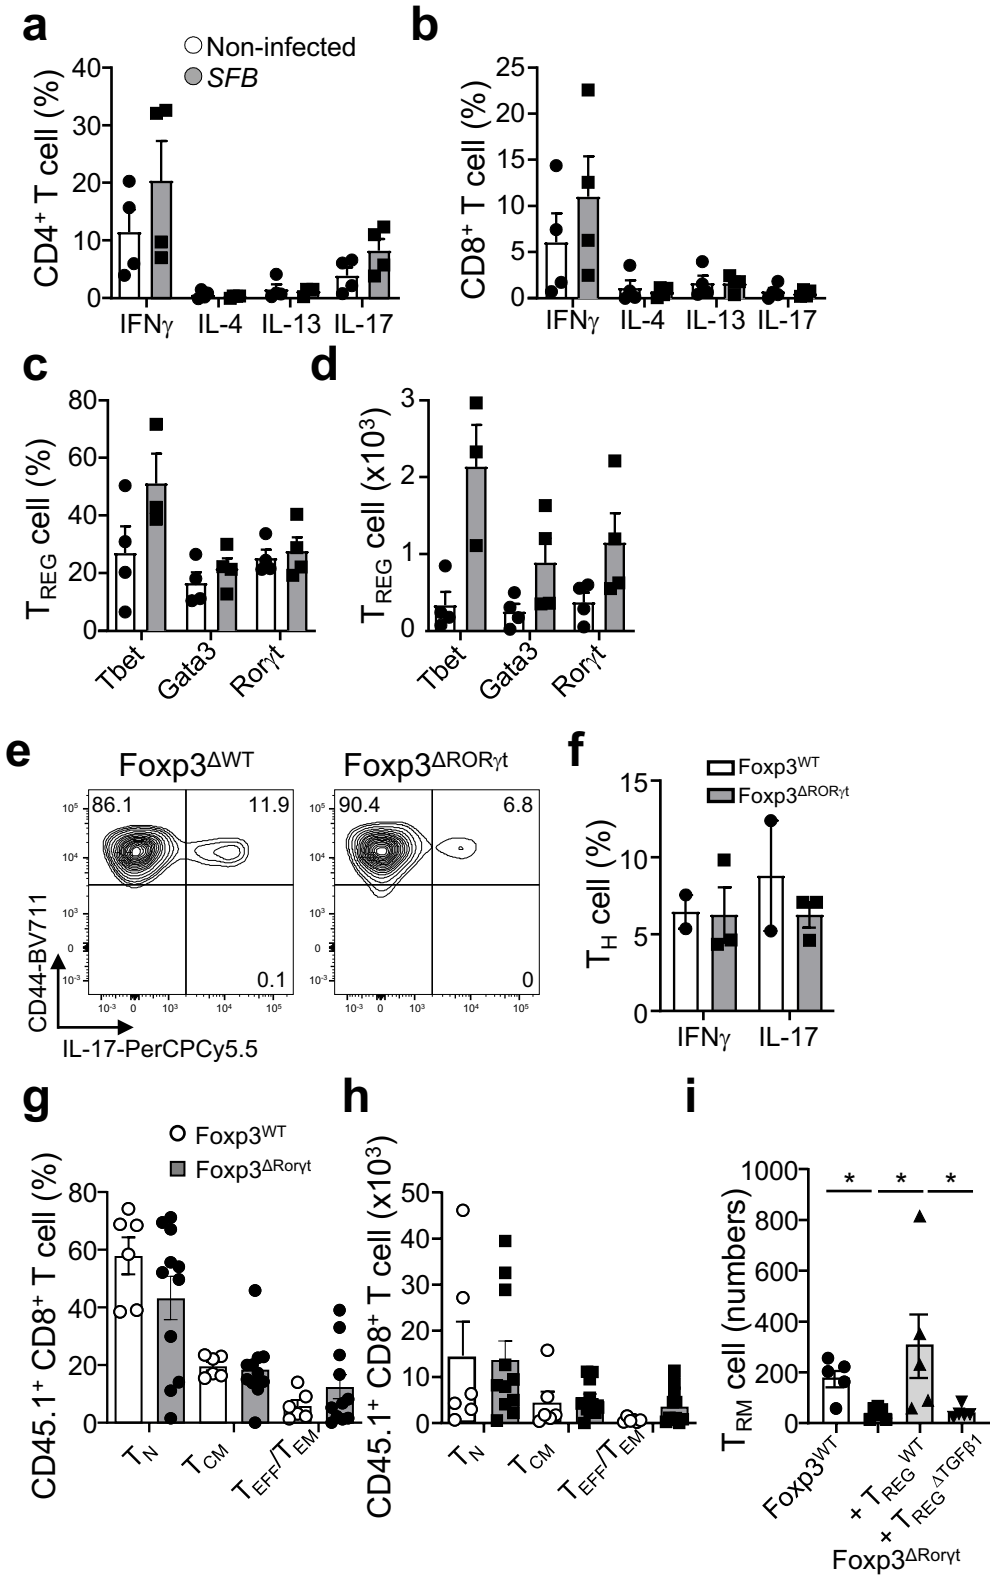

**Supplementary Figure 5. SFB faecal transplant results in a mixed Th-1/Th-17 immune response.** C57BL/6 mice received a transplant of 100mg of SFB-containing faeces. 10 days post-infection small intestine LPL were isolated and compared with the ones from non-infected mice via flow cytometry for cytokine production  $T_{REG}$  phenotypes. (a) Percentage of activated  $CD44^+ CD4^+$  T cells producing indicated cytokines and (b) respective cell numbers (n=4, N=2). (c) Percentage of  $Foxp3^+ CD4^+$  T cells producing indicated transcription factors and (d) respective cell numbers (n=4, N=2). (e-f)  $Foxp3^{WT}$  and  $Foxp3^{\Delta ROR\gamma t}$  mice received the faecal transplant. Small intestine LPL were assessed for  $IFN\gamma$  and IL-17 production within their Th cell population. (e) Example flow plot for  $IFN\gamma$  and IL-17 within activated  $CD4^+$  T cells and (f) respective percentage ( $Foxp3^{WT}$  n=2,  $Foxp3^{\Delta ROR\gamma t}$  n=3, N=2). (g-h) Splenocytes were collected and analysed for the presence and memory phenotype of transferred cells.  $CD45.1 CD8^+$  T cell (g) proportions in the spleen were assessed for naïve ( $T_N$ ,  $CD44^- CD62L^+$ ), central memory ( $T_{CM}$ ,  $CD44^+ CD62L^+$ ) and effector memory/effector ( $T_{EM}/T_{EFF}$ ,  $CD44^+ CD62L^-$ ) and for their (h) respective numbers ( $Foxp3^{WT}$  n=6,  $Foxp3^{\Delta ROR\gamma t}$  n=11, N=3). i) Mice were transferred with indicated condition receiving control  $T_{REG}$  cells prior to the first of four intranasal challenges with  $10^6$  spores of *Aspergillus fumigatus*. Lungs were collected and transferred  $CD45.1 CD8$  T cells were analysed. Numbers of  $CD45.1 CD8 T_{RM}$  cells in all conditions,  $p_{(Foxp3^{WT} vs Foxp3^{\Delta ROR\gamma t})}=0,0173$ ,  $p_{(Foxp3^{\Delta ROR\gamma t} vs Foxp3^{\Delta ROR\gamma t}+WT Tregs)}=0,0108$ ,  $p_{(Foxp3^{\Delta ROR\gamma t} vs Foxp3^{\Delta ROR\gamma t}+Treg^{\Delta TGF\beta 1})}=0,0303$  ( $Foxp3^{WT}$ ;  $Foxp3^{\Delta ROR\gamma t}$  n=6, N=4;  $Foxp3^{\Delta ROR\gamma t} + T_{REG}^{WT}$  n=5, N=2;  $Foxp3^{\Delta ROR\gamma t} + T_{REG}^{\Delta TGF\beta 1}$  n=6, N=2). 2-sided Mann-Whitney analysis was applied to compare the differences between mouse strains. Data is presented as bars of mean  $\pm$  SEM with single data points.



# Supplementary Figure 6

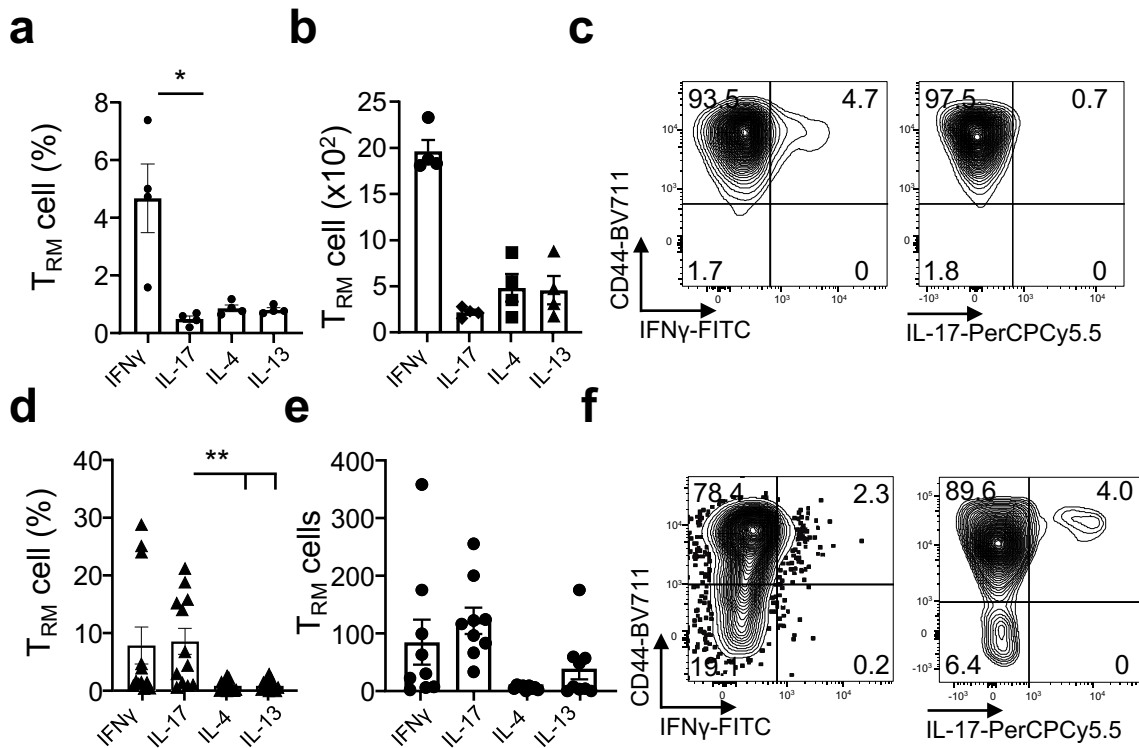

**Supplementary Figure 6.  $T_{RM}$  cell identity is maintained.** (a-c) Mice were infected intranasally with 1000 PFU of Influenza X31 strain (H3N2). Post-infection lungs were collected, and cells analysed. (a) Percentage of  $T_{RM}$  cells (CD69 $^{+}$ KLRG1 $^{+}$ CD8 $^{+}$ ) producing indicated cytokines,  $p_{(IFN-\gamma \text{ vs IL-17})}=0,0286$  and (b) respective numbers ( $n=4$ ,  $N=2$ ) and (c) representative flow cytometry plots for IFN $\gamma$  and IL-17. (d-f) Mice were challenged four times with  $10^6$  spores of *Aspergillus fumigatus*, post-infection lungs were collected, and cells were analysed with flow cytometry for cytokine production. (d) Percentage of  $T_{RM}$  cells (CD69 $^{+}$ KLRG1 $^{+}$ CD8 $^{+}$ ) producing indicated cytokines,  $p_{(IL-17 \text{ vs IL-4})}=0,0014$  and  $p_{(IL-17 \text{ vs IL-13})}=0,0011$  ( $n=12$ ,  $N=4$ ), and (e) respective numbers ( $n=9$ ,  $N=4$ ) and (f) representative flow cytometry plots for IFN $\gamma$  and IL-17. 2-sided Mann-Whitney analysis was applied to compare groups. Data is presented as bars of mean  $\pm$  SEM with single data points.

# Supplementary Figure 7

**a**

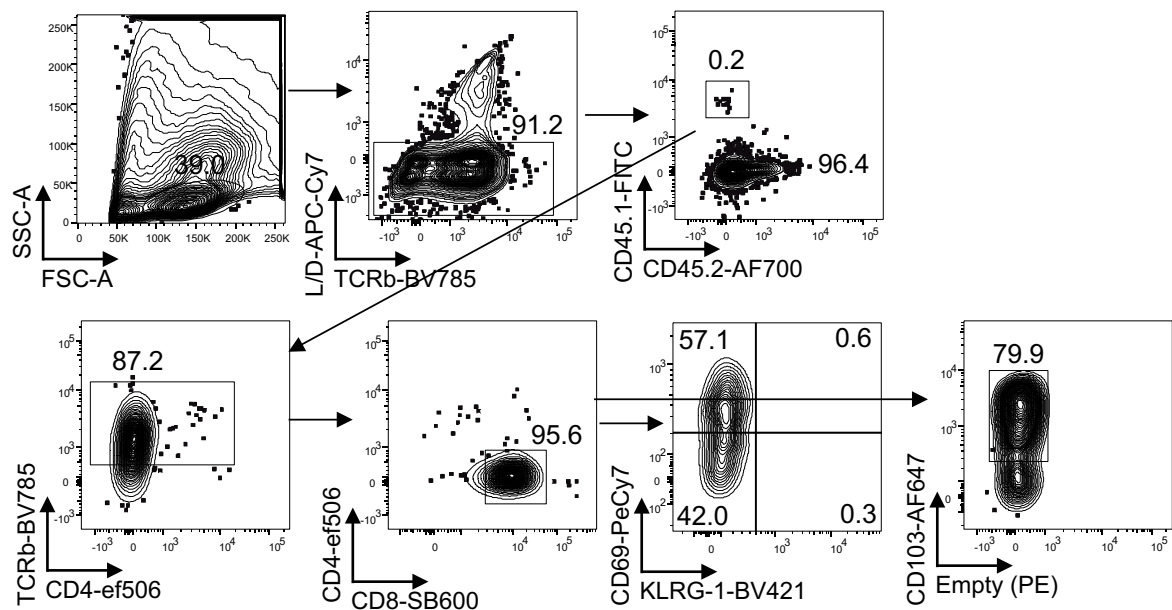

**b**

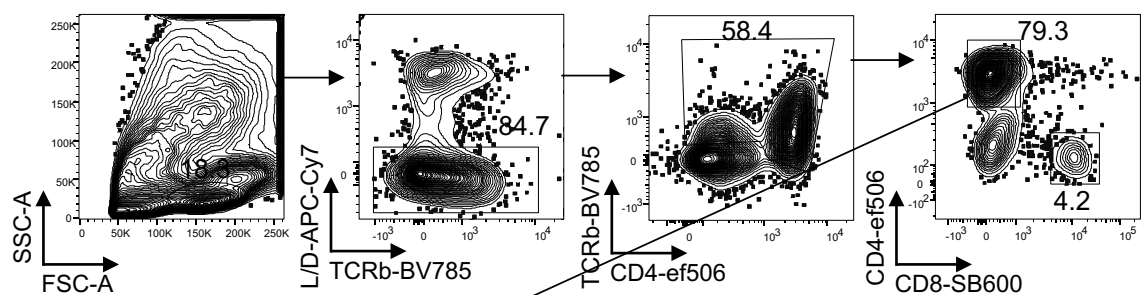

**c**

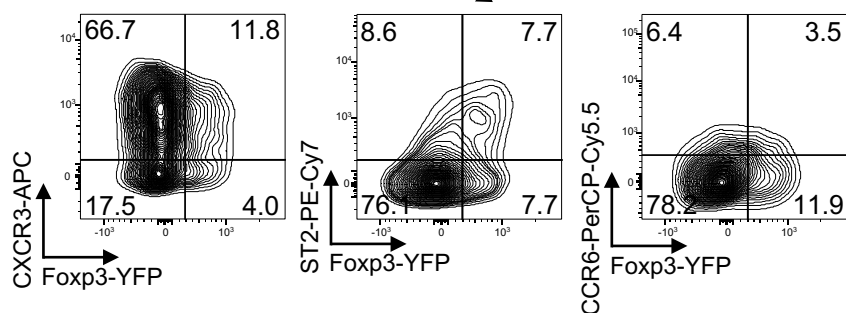

**Supplementary Figure 7. Flow cytometry analysis gating strategy.** a) Representative flow cytometry plots from lungs cells of a C57BL/6 mouse showing Lymphocyte gating; dead cell exclusion, followed by CD45.1 cell selection (if used): followed by T cell selection; followed by CD8 T cell selection and an example of CD69 - KLRG-1 or CD103 plotting. b) Representative flow cytometry plots from lung cells of a C57BL/6 mouse, showing Lymphocyte gating; dead cell exclusion: followed by T cell selection; followed by CD4 (or CD8) T cell selection. c) Example of T<sub>REG</sub> cell and chemokine receptor staining using Foxp3-YFP, pre-gated on CD4.

For cytokine staining, pre-gated on CD4 or CD8, see main figures 1, 2 and 3.

**Supplementary Table 1. Details of antibodies used in the study.**

| Epitope       | Fluorochrome | Catalogue number | Clone        | Dilution | Supplier    |
|---------------|--------------|------------------|--------------|----------|-------------|
| CD103         | BV711        | 121435           | 2E7          | 1:300    | Biolegend   |
|               | AF647        | 121410           |              |          |             |
| CD183 (CXCR3) | APC          | 126512           | CXCR3-173    | 1:500    |             |
| CD196 (CCR6)  | PerCPCy5.5   | 129810           | 29-2L17      | 1:200    |             |
|               | PE           | 129804           |              |          |             |
| CD25          | PerCP/Cy5.5  | 102028           | PC61         | 1:500    |             |
|               | APC          | 102012           |              |          |             |
| CD4           | PE-Cy7       | 100528           | RM4-5        | 1:1000   |             |
|               | AF700        | 100430           | GK1.5        | 1:800    |             |
| CD44          | AF700        | 103026           | IM7          | 1:500    |             |
|               | BV711        | 103057           |              |          |             |
| CD45.1        | PacificB     | 110722           | A20          | 1:500    |             |
|               | FITC         | 110706           |              |          |             |
|               | BV605        | 110738           |              |          |             |
| CD45.2        | AF647        | 109814           | 104          | 1:500    |             |
|               | AF700        | 109822           |              |          |             |
| CD62L         | FITC         | 104406           | MEL-14       | 1:500    |             |
|               | PE           | 104408           |              |          |             |
| CD69          | PE-Cy7       | 104512           | H1.2F3       | 1:300    |             |
|               | BV650        | 104541           |              |          |             |
| CD8α          | APC          | 100712           | 53-6.7       | 1:500    |             |
|               | BV711        | 100748           |              |          |             |
| FoxP3         | AF488        | 126406           | MF-14        | 1:200    |             |
| KLRG1 (MAFA)  | BV421        | 138414           | 2F1/KLRG1    | 1:1000   |             |
| ST2 (IL-33R)  | PECy7        | 146610           | DIH9         | 1:200    |             |
| T-bet         | PECy7        | 644824           | 4B10         | 1:200    |             |
| IFNγ          | APC          | 505810           | XMG1.2       | 1:300    |             |
|               | FITC         | 505806           |              |          |             |
| IL-4          | PE           | 504104           | 11B11        | 1:200    |             |
| IL-17A        | PerCPCy5.5   | 506920           | TC11-18H10.1 | 1:300    |             |
| TCRβ          | Pacific Blue | 109226           | H57-597      | 1:500    |             |
|               | PerCPCy5.5   | 109228           |              |          |             |
|               | BV785        | 109249           |              |          |             |
| CD4           | ef506        | 69-0042-82       | RM4-5        | 1:800    | eBioscience |
| CD8α          | SB600        | 63-0691-82       | 53-6.7       | 1:500    |             |
| Eomes         | AF488        | 53-4875-80       | DAN11MAG     | 1:200    |             |
| GATA-3        | PE           | 14-9966-82       | TWAJ         | 1:50     |             |
| RORγt         | PE           | 12-6981-82       | B2D          | 1:100    |             |
|               | APC          | 17-6981-82       |              |          |             |
| IL-13         | PE Cy7       | 25-7133-82       | eBio13A      | 1:200    |             |
